# Supplementary material for: A two-phased study on the use of remote photoplethysmography (rPPG) in paediatric care
Source: PubMed Central journal article supplement — Ann Transl Med. 2024 May 27;12(3):46. doi: 10.21037/atm-23-1896 (PMC11193567; doi:10.21037/atm-23-1896), 2024-05-27
Supplement: atm-12-03-46-coif.pdf [file atm-12-03-46-coif.pdf]

## ICMJE DISCLOSURE FORM

Date: 13/12/2023

Your Name: Nur Adila Binte Ahmad Hatib

Manuscript Title: A two-phased study on the use of remote photoplethysmography (rPPG) in paediatric care

Manuscript number (if known): ATM-23-1896

In the interest of transparency, we ask you to disclose all relationships/activities/interests listed below that are related to the content of your manuscript. "Related" means any relation with for-profit or not-for-profit third parties whose interests may be affected by the content of the manuscript. Disclosure represents a commitment to transparency and does not necessarily indicate a bias. If you are in doubt about whether to list a relationship/activity/interest, it is preferable that you do so.

The following questions apply to the author's relationships/activities/interests as they relate to the current manuscript only.

The author's relationships/activities/interests should be defined broadly. For example, if your manuscript pertains to the epidemiology of hypertension, you should declare all relationships with manufacturers of antihypertensive medication, even if that medication is not mentioned in the manuscript.

In item #1 below, report all support for the work reported in this manuscript without time limit. For all other items, the time frame for disclosure is the past 36 months.

|                                                           |                                                                                                                                                                                | Name all entities with whom you have this relationship or indicate none (add rows as needed) | Specifications/Comments (e.g., if payments were made to you or to your institution) |
|-----------------------------------------------------------|--------------------------------------------------------------------------------------------------------------------------------------------------------------------------------|----------------------------------------------------------------------------------------------|-------------------------------------------------------------------------------------|
| <b>Time frame: Since the initial planning of the work</b> |                                                                                                                                                                                |                                                                                              |                                                                                     |
| 1                                                         | All support for the present manuscript (e.g., funding, provision of study materials, medical writing, article processing charges, etc.)<br><b>No time limit for this item.</b> | ___ None                                                                                     |                                                                                     |
|                                                           |                                                                                                                                                                                |                                                                                              |                                                                                     |
|                                                           |                                                                                                                                                                                |                                                                                              |                                                                                     |
|                                                           |                                                                                                                                                                                |                                                                                              |                                                                                     |
|                                                           |                                                                                                                                                                                |                                                                                              |                                                                                     |
|                                                           |                                                                                                                                                                                |                                                                                              |                                                                                     |
| <b>Time frame: past 36 months</b>                         |                                                                                                                                                                                |                                                                                              |                                                                                     |
| 2                                                         | Grants or contracts from any entity (if not indicated in item #1 above).                                                                                                       | ___ None                                                                                     |                                                                                     |
|                                                           |                                                                                                                                                                                |                                                                                              |                                                                                     |
| 3                                                         | Royalties or licenses                                                                                                                                                          | ___ None                                                                                     |                                                                                     |
|                                                           |                                                                                                                                                                                |                                                                                              |                                                                                     |
| 4                                                         | Consulting fees                                                                                                                                                                | ___ None                                                                                     |                                                                                     |
|                                                           |                                                                                                                                                                                |                                                                                              |                                                                                     |
|                                                           |                                                                                                                                                                                |                                                                                              |                                                                                     |

|    |                                                                                                              |          |  |
|----|--------------------------------------------------------------------------------------------------------------|----------|--|
| 5  | Payment or honoraria for lectures, presentations, speakers bureaus, manuscript writing or educational events | ___ None |  |
|    |                                                                                                              |          |  |
|    |                                                                                                              |          |  |
| 6  | Payment for expert testimony                                                                                 | ___ None |  |
|    |                                                                                                              |          |  |
|    |                                                                                                              |          |  |
| 7  | Support for attending meetings and/or travel                                                                 | ___ None |  |
|    |                                                                                                              |          |  |
|    |                                                                                                              |          |  |
| 8  | Patents planned, issued or pending                                                                           | ___ None |  |
|    |                                                                                                              |          |  |
|    |                                                                                                              |          |  |
| 9  | Participation on a Data Safety Monitoring Board or Advisory Board                                            | ___ None |  |
|    |                                                                                                              |          |  |
|    |                                                                                                              |          |  |
| 10 | Leadership or fiduciary role in other board, society, committee or advocacy group, paid or unpaid            | ___ None |  |
|    |                                                                                                              |          |  |
|    |                                                                                                              |          |  |
| 11 | Stock or stock options                                                                                       | ___ None |  |
|    |                                                                                                              |          |  |
|    |                                                                                                              |          |  |
| 12 | Receipt of equipment, materials, drugs, medical writing, gifts or other services                             | ___ None |  |
|    |                                                                                                              |          |  |
|    |                                                                                                              |          |  |
| 13 | Other financial or non-financial interests                                                                   | ___ None |  |
|    |                                                                                                              |          |  |
|    |                                                                                                              |          |  |

**Please summarize the above conflict of interest in the following box:**

There is no conflict of interest to declare.

**Please place an "X" next to the following statement to indicate your agreement:**

**X   I certify that I have answered every question and have not altered the wording of any of the questions on this form.**

## ICMJE DISCLOSURE FORM

Date: 13/12/2023

Your Name: Jan Hau Lee

Manuscript Title: A two-phased study on the use of remote photoplethysmography (rPPG) in paediatric care

Manuscript number (if known): ATM-23-1896

In the interest of transparency, we ask you to disclose all relationships/activities/interests listed below that are related to the content of your manuscript. "Related" means any relation with for-profit or not-for-profit third parties whose interests may be affected by the content of the manuscript. Disclosure represents a commitment to transparency and does not necessarily indicate a bias. If you are in doubt about whether to list a relationship/activity/interest, it is preferable that you do so.

The following questions apply to the author's relationships/activities/interests as they relate to the current manuscript only.

The author's relationships/activities/interests should be defined broadly. For example, if your manuscript pertains to the epidemiology of hypertension, you should declare all relationships with manufacturers of antihypertensive medication, even if that medication is not mentioned in the manuscript.

In item #1 below, report all support for the work reported in this manuscript without time limit. For all other items, the time frame for disclosure is the past 36 months.

|                                                           |                                                                                                                                                                                | Name all entities with whom you have this relationship or indicate none (add rows as needed) | Specifications/Comments (e.g., if payments were made to you or to your institution) |
|-----------------------------------------------------------|--------------------------------------------------------------------------------------------------------------------------------------------------------------------------------|----------------------------------------------------------------------------------------------|-------------------------------------------------------------------------------------|
| <b>Time frame: Since the initial planning of the work</b> |                                                                                                                                                                                |                                                                                              |                                                                                     |
| 1                                                         | All support for the present manuscript (e.g., funding, provision of study materials, medical writing, article processing charges, etc.)<br><b>No time limit for this item.</b> | ___ None                                                                                     |                                                                                     |
|                                                           |                                                                                                                                                                                |                                                                                              |                                                                                     |
|                                                           |                                                                                                                                                                                |                                                                                              |                                                                                     |
|                                                           |                                                                                                                                                                                |                                                                                              |                                                                                     |
|                                                           |                                                                                                                                                                                |                                                                                              |                                                                                     |
|                                                           |                                                                                                                                                                                |                                                                                              |                                                                                     |
|                                                           |                                                                                                                                                                                |                                                                                              |                                                                                     |
| <b>Time frame: past 36 months</b>                         |                                                                                                                                                                                |                                                                                              |                                                                                     |
| 2                                                         | Grants or contracts from any entity (if not indicated in item #1 above).                                                                                                       | ___ None                                                                                     |                                                                                     |
|                                                           |                                                                                                                                                                                |                                                                                              |                                                                                     |
| 3                                                         | Royalties or licenses                                                                                                                                                          | ___ None                                                                                     |                                                                                     |
|                                                           |                                                                                                                                                                                |                                                                                              |                                                                                     |
| 4                                                         | Consulting fees                                                                                                                                                                | ___ None                                                                                     |                                                                                     |
|                                                           |                                                                                                                                                                                |                                                                                              |                                                                                     |
|                                                           |                                                                                                                                                                                |                                                                                              |                                                                                     |

|    |                                                                                                              |          |  |
|----|--------------------------------------------------------------------------------------------------------------|----------|--|
| 5  | Payment or honoraria for lectures, presentations, speakers bureaus, manuscript writing or educational events | ___ None |  |
|    |                                                                                                              |          |  |
|    |                                                                                                              |          |  |
| 6  | Payment for expert testimony                                                                                 | ___ None |  |
|    |                                                                                                              |          |  |
|    |                                                                                                              |          |  |
| 7  | Support for attending meetings and/or travel                                                                 | ___ None |  |
|    |                                                                                                              |          |  |
|    |                                                                                                              |          |  |
| 8  | Patents planned, issued or pending                                                                           | ___ None |  |
|    |                                                                                                              |          |  |
|    |                                                                                                              |          |  |
| 9  | Participation on a Data Safety Monitoring Board or Advisory Board                                            | ___ None |  |
|    |                                                                                                              |          |  |
|    |                                                                                                              |          |  |
| 10 | Leadership or fiduciary role in other board, society, committee or advocacy group, paid or unpaid            | ___ None |  |
|    |                                                                                                              |          |  |
|    |                                                                                                              |          |  |
| 11 | Stock or stock options                                                                                       | ___ None |  |
|    |                                                                                                              |          |  |
|    |                                                                                                              |          |  |
| 12 | Receipt of equipment, materials, drugs, medical writing, gifts or other services                             | ___ None |  |
|    |                                                                                                              |          |  |
|    |                                                                                                              |          |  |
| 13 | Other financial or non-financial interests                                                                   | ___ None |  |
|    |                                                                                                              |          |  |
|    |                                                                                                              |          |  |

**Please summarize the above conflict of interest in the following box:**

There is no conflict of interest to declare.

**Please place an "X" next to the following statement to indicate your agreement:**

**X   I certify that I have answered every question and have not altered the wording of any of the questions on this form.**

## ICMJE DISCLOSURE FORM

Date: 13/12/2023

Your Name: Shu-Ling Chong

Manuscript Title: A two-phased study on the use of remote photoplethysmography (rPPG) in paediatric care

Manuscript number (if known): ATM-23-1896

In the interest of transparency, we ask you to disclose all relationships/activities/interests listed below that are related to the content of your manuscript. "Related" means any relation with for-profit or not-for-profit third parties whose interests may be affected by the content of the manuscript. Disclosure represents a commitment to transparency and does not necessarily indicate a bias. If you are in doubt about whether to list a relationship/activity/interest, it is preferable that you do so.

The following questions apply to the author's relationships/activities/interests as they relate to the current manuscript only.

The author's relationships/activities/interests should be defined broadly. For example, if your manuscript pertains to the epidemiology of hypertension, you should declare all relationships with manufacturers of antihypertensive medication, even if that medication is not mentioned in the manuscript.

In item #1 below, report all support for the work reported in this manuscript without time limit. For all other items, the time frame for disclosure is the past 36 months.

|                                                           |                                                                                                                                                                                | Name all entities with whom you have this relationship or indicate none (add rows as needed) | Specifications/Comments (e.g., if payments were made to you or to your institution) |
|-----------------------------------------------------------|--------------------------------------------------------------------------------------------------------------------------------------------------------------------------------|----------------------------------------------------------------------------------------------|-------------------------------------------------------------------------------------|
| <b>Time frame: Since the initial planning of the work</b> |                                                                                                                                                                                |                                                                                              |                                                                                     |
| 1                                                         | All support for the present manuscript (e.g., funding, provision of study materials, medical writing, article processing charges, etc.)<br><b>No time limit for this item.</b> | ___ None                                                                                     |                                                                                     |
|                                                           |                                                                                                                                                                                |                                                                                              |                                                                                     |
|                                                           |                                                                                                                                                                                |                                                                                              |                                                                                     |
|                                                           |                                                                                                                                                                                |                                                                                              |                                                                                     |
|                                                           |                                                                                                                                                                                |                                                                                              |                                                                                     |
|                                                           |                                                                                                                                                                                |                                                                                              |                                                                                     |
|                                                           |                                                                                                                                                                                |                                                                                              |                                                                                     |
| <b>Time frame: past 36 months</b>                         |                                                                                                                                                                                |                                                                                              |                                                                                     |
| 2                                                         | Grants or contracts from any entity (if not indicated in item #1 above).                                                                                                       | ___ None                                                                                     |                                                                                     |
|                                                           |                                                                                                                                                                                |                                                                                              |                                                                                     |
| 3                                                         | Royalties or licenses                                                                                                                                                          | ___ None                                                                                     |                                                                                     |
|                                                           |                                                                                                                                                                                |                                                                                              |                                                                                     |
| 4                                                         | Consulting fees                                                                                                                                                                | ___ None                                                                                     |                                                                                     |
|                                                           |                                                                                                                                                                                |                                                                                              |                                                                                     |
|                                                           |                                                                                                                                                                                |                                                                                              |                                                                                     |

|    |                                                                                                              |          |  |
|----|--------------------------------------------------------------------------------------------------------------|----------|--|
| 5  | Payment or honoraria for lectures, presentations, speakers bureaus, manuscript writing or educational events | ___ None |  |
|    |                                                                                                              |          |  |
|    |                                                                                                              |          |  |
| 6  | Payment for expert testimony                                                                                 | ___ None |  |
|    |                                                                                                              |          |  |
|    |                                                                                                              |          |  |
| 7  | Support for attending meetings and/or travel                                                                 | ___ None |  |
|    |                                                                                                              |          |  |
|    |                                                                                                              |          |  |
| 8  | Patents planned, issued or pending                                                                           | ___ None |  |
|    |                                                                                                              |          |  |
|    |                                                                                                              |          |  |
| 9  | Participation on a Data Safety Monitoring Board or Advisory Board                                            | ___ None |  |
|    |                                                                                                              |          |  |
|    |                                                                                                              |          |  |
| 10 | Leadership or fiduciary role in other board, society, committee or advocacy group, paid or unpaid            | ___ None |  |
|    |                                                                                                              |          |  |
|    |                                                                                                              |          |  |
| 11 | Stock or stock options                                                                                       | ___ None |  |
|    |                                                                                                              |          |  |
|    |                                                                                                              |          |  |
| 12 | Receipt of equipment, materials, drugs, medical writing, gifts or other services                             | ___ None |  |
|    |                                                                                                              |          |  |
|    |                                                                                                              |          |  |
| 13 | Other financial or non-financial interests                                                                   | ___ None |  |
|    |                                                                                                              |          |  |
|    |                                                                                                              |          |  |

**Please summarize the above conflict of interest in the following box:**

There is no conflict of interest to declare.

**Please place an "X" next to the following statement to indicate your agreement:**

**X   I certify that I have answered every question and have not altered the wording of any of the questions on this form.**

## ICMJE DISCLOSURE FORM

Date: 13/12/2023

Your Name: Qian Wen Sng

Manuscript Title: A two-phased study on the use of remote photoplethysmography (rPPG) in paediatric care

Manuscript number (if known): ATM-23-1896

In the interest of transparency, we ask you to disclose all relationships/activities/interests listed below that are related to the content of your manuscript. "Related" means any relation with for-profit or not-for-profit third parties whose interests may be affected by the content of the manuscript. Disclosure represents a commitment to transparency and does not necessarily indicate a bias. If you are in doubt about whether to list a relationship/activity/interest, it is preferable that you do so.

The following questions apply to the author's relationships/activities/interests as they relate to the current manuscript only.

The author's relationships/activities/interests should be defined broadly. For example, if your manuscript pertains to the epidemiology of hypertension, you should declare all relationships with manufacturers of antihypertensive medication, even if that medication is not mentioned in the manuscript.

In item #1 below, report all support for the work reported in this manuscript without time limit. For all other items, the time frame for disclosure is the past 36 months.

|                                                           |                                                                                                                                                                                | Name all entities with whom you have this relationship or indicate none (add rows as needed) | Specifications/Comments (e.g., if payments were made to you or to your institution) |
|-----------------------------------------------------------|--------------------------------------------------------------------------------------------------------------------------------------------------------------------------------|----------------------------------------------------------------------------------------------|-------------------------------------------------------------------------------------|
| <b>Time frame: Since the initial planning of the work</b> |                                                                                                                                                                                |                                                                                              |                                                                                     |
| 1                                                         | All support for the present manuscript (e.g., funding, provision of study materials, medical writing, article processing charges, etc.)<br><b>No time limit for this item.</b> | ___ None                                                                                     |                                                                                     |
|                                                           |                                                                                                                                                                                |                                                                                              |                                                                                     |
|                                                           |                                                                                                                                                                                |                                                                                              |                                                                                     |
|                                                           |                                                                                                                                                                                |                                                                                              |                                                                                     |
|                                                           |                                                                                                                                                                                |                                                                                              |                                                                                     |
|                                                           |                                                                                                                                                                                |                                                                                              |                                                                                     |
| <b>Time frame: past 36 months</b>                         |                                                                                                                                                                                |                                                                                              |                                                                                     |
| 2                                                         | Grants or contracts from any entity (if not indicated in item #1 above).                                                                                                       | ___ None                                                                                     |                                                                                     |
|                                                           |                                                                                                                                                                                |                                                                                              |                                                                                     |
| 3                                                         | Royalties or licenses                                                                                                                                                          | ___ None                                                                                     |                                                                                     |
|                                                           |                                                                                                                                                                                |                                                                                              |                                                                                     |
| 4                                                         | Consulting fees                                                                                                                                                                | ___ None                                                                                     |                                                                                     |
|                                                           |                                                                                                                                                                                |                                                                                              |                                                                                     |
|                                                           |                                                                                                                                                                                |                                                                                              |                                                                                     |

|    |                                                                                                              |          |  |
|----|--------------------------------------------------------------------------------------------------------------|----------|--|
| 5  | Payment or honoraria for lectures, presentations, speakers bureaus, manuscript writing or educational events | ___ None |  |
|    |                                                                                                              |          |  |
|    |                                                                                                              |          |  |
| 6  | Payment for expert testimony                                                                                 | ___ None |  |
|    |                                                                                                              |          |  |
|    |                                                                                                              |          |  |
| 7  | Support for attending meetings and/or travel                                                                 | ___ None |  |
|    |                                                                                                              |          |  |
|    |                                                                                                              |          |  |
| 8  | Patents planned, issued or pending                                                                           | ___ None |  |
|    |                                                                                                              |          |  |
|    |                                                                                                              |          |  |
| 9  | Participation on a Data Safety Monitoring Board or Advisory Board                                            | ___ None |  |
|    |                                                                                                              |          |  |
|    |                                                                                                              |          |  |
| 10 | Leadership or fiduciary role in other board, society, committee or advocacy group, paid or unpaid            | ___ None |  |
|    |                                                                                                              |          |  |
|    |                                                                                                              |          |  |
| 11 | Stock or stock options                                                                                       | ___ None |  |
|    |                                                                                                              |          |  |
|    |                                                                                                              |          |  |
| 12 | Receipt of equipment, materials, drugs, medical writing, gifts or other services                             | ___ None |  |
|    |                                                                                                              |          |  |
|    |                                                                                                              |          |  |
| 13 | Other financial or non-financial interests                                                                   | ___ None |  |
|    |                                                                                                              |          |  |
|    |                                                                                                              |          |  |

**Please summarize the above conflict of interest in the following box:**

There is no conflict of interest to declare.

**Please place an "X" next to the following statement to indicate your agreement:**

**X   I certify that I have answered every question and have not altered the wording of any of the questions on this form.**



## ICMJE DISCLOSURE FORM

Date: 13/12/2023

Your Name: Victoria Shi Rui Tan

Manuscript Title: A two-phased study on the use of remote photoplethysmography (rPPG) in paediatric care

Manuscript number (if known): ATM-23-1896

In the interest of transparency, we ask you to disclose all relationships/activities/interests listed below that are related to the content of your manuscript. "Related" means any relation with for-profit or not-for-profit third parties whose interests may be affected by the content of the manuscript. Disclosure represents a commitment to transparency and does not necessarily indicate a bias. If you are in doubt about whether to list a relationship/activity/interest, it is preferable that you do so.

The following questions apply to the author's relationships/activities/interests as they relate to the current manuscript only.

The author's relationships/activities/interests should be defined broadly. For example, if your manuscript pertains to the epidemiology of hypertension, you should declare all relationships with manufacturers of antihypertensive medication, even if that medication is not mentioned in the manuscript.

In item #1 below, report all support for the work reported in this manuscript without time limit. For all other items, the time frame for disclosure is the past 36 months.

|                                                           |                                                                                                                                                                                | Name all entities with whom you have this relationship or indicate none (add rows as needed) | Specifications/Comments (e.g., if payments were made to you or to your institution) |
|-----------------------------------------------------------|--------------------------------------------------------------------------------------------------------------------------------------------------------------------------------|----------------------------------------------------------------------------------------------|-------------------------------------------------------------------------------------|
| <b>Time frame: Since the initial planning of the work</b> |                                                                                                                                                                                |                                                                                              |                                                                                     |
| 1                                                         | All support for the present manuscript (e.g., funding, provision of study materials, medical writing, article processing charges, etc.)<br><b>No time limit for this item.</b> | ___ None                                                                                     |                                                                                     |
|                                                           |                                                                                                                                                                                |                                                                                              |                                                                                     |
|                                                           |                                                                                                                                                                                |                                                                                              |                                                                                     |
|                                                           |                                                                                                                                                                                |                                                                                              |                                                                                     |
|                                                           |                                                                                                                                                                                |                                                                                              |                                                                                     |
|                                                           |                                                                                                                                                                                |                                                                                              |                                                                                     |
| <b>Time frame: past 36 months</b>                         |                                                                                                                                                                                |                                                                                              |                                                                                     |
| 2                                                         | Grants or contracts from any entity (if not indicated in item #1 above).                                                                                                       | ___ None                                                                                     |                                                                                     |
|                                                           |                                                                                                                                                                                |                                                                                              |                                                                                     |
| 3                                                         | Royalties or licenses                                                                                                                                                          | ___ None                                                                                     |                                                                                     |
|                                                           |                                                                                                                                                                                |                                                                                              |                                                                                     |
| 4                                                         | Consulting fees                                                                                                                                                                | ___ None                                                                                     |                                                                                     |
|                                                           |                                                                                                                                                                                |                                                                                              |                                                                                     |
|                                                           |                                                                                                                                                                                |                                                                                              |                                                                                     |

|    |                                                                                                              |          |  |
|----|--------------------------------------------------------------------------------------------------------------|----------|--|
| 5  | Payment or honoraria for lectures, presentations, speakers bureaus, manuscript writing or educational events | ___ None |  |
|    |                                                                                                              |          |  |
|    |                                                                                                              |          |  |
| 6  | Payment for expert testimony                                                                                 | ___ None |  |
|    |                                                                                                              |          |  |
|    |                                                                                                              |          |  |
| 7  | Support for attending meetings and/or travel                                                                 | ___ None |  |
|    |                                                                                                              |          |  |
|    |                                                                                                              |          |  |
| 8  | Patents planned, issued or pending                                                                           | ___ None |  |
|    |                                                                                                              |          |  |
|    |                                                                                                              |          |  |
| 9  | Participation on a Data Safety Monitoring Board or Advisory Board                                            | ___ None |  |
|    |                                                                                                              |          |  |
|    |                                                                                                              |          |  |
| 10 | Leadership or fiduciary role in other board, society, committee or advocacy group, paid or unpaid            | ___ None |  |
|    |                                                                                                              |          |  |
|    |                                                                                                              |          |  |
| 11 | Stock or stock options                                                                                       | ___ None |  |
|    |                                                                                                              |          |  |
|    |                                                                                                              |          |  |
| 12 | Receipt of equipment, materials, drugs, medical writing, gifts or other services                             | ___ None |  |
|    |                                                                                                              |          |  |
|    |                                                                                                              |          |  |
| 13 | Other financial or non-financial interests                                                                   | ___ None |  |
|    |                                                                                                              |          |  |
|    |                                                                                                              |          |  |

**Please summarize the above conflict of interest in the following box:**

There is no conflict of interest to declare.

**Please place an "X" next to the following statement to indicate your agreement:**

**X   I certify that I have answered every question and have not altered the wording of any of the questions on this form.**

## ICMJE DISCLOSURE FORM

Date: 13/12/2023

Your Name: Gene Yong-Kwang Ong

Manuscript Title: A two-phased study on the use of remote photoplethysmography (rPPG) in paediatric care

Manuscript number (if known): ATM-23-1896

In the interest of transparency, we ask you to disclose all relationships/activities/interests listed below that are related to the content of your manuscript. "Related" means any relation with for-profit or not-for-profit third parties whose interests may be affected by the content of the manuscript. Disclosure represents a commitment to transparency and does not necessarily indicate a bias. If you are in doubt about whether to list a relationship/activity/interest, it is preferable that you do so.

The following questions apply to the author's relationships/activities/interests as they relate to the current manuscript only.

The author's relationships/activities/interests should be defined broadly. For example, if your manuscript pertains to the epidemiology of hypertension, you should declare all relationships with manufacturers of antihypertensive medication, even if that medication is not mentioned in the manuscript.

In item #1 below, report all support for the work reported in this manuscript without time limit. For all other items, the time frame for disclosure is the past 36 months.

|                                                           |                                                                                                                                                                                | Name all entities with whom you have this relationship or indicate none (add rows as needed) | Specifications/Comments (e.g., if payments were made to you or to your institution) |
|-----------------------------------------------------------|--------------------------------------------------------------------------------------------------------------------------------------------------------------------------------|----------------------------------------------------------------------------------------------|-------------------------------------------------------------------------------------|
| <b>Time frame: Since the initial planning of the work</b> |                                                                                                                                                                                |                                                                                              |                                                                                     |
| 1                                                         | All support for the present manuscript (e.g., funding, provision of study materials, medical writing, article processing charges, etc.)<br><b>No time limit for this item.</b> | None                                                                                         |                                                                                     |
|                                                           |                                                                                                                                                                                |                                                                                              |                                                                                     |
|                                                           |                                                                                                                                                                                |                                                                                              |                                                                                     |
|                                                           |                                                                                                                                                                                |                                                                                              |                                                                                     |
|                                                           |                                                                                                                                                                                |                                                                                              |                                                                                     |
|                                                           |                                                                                                                                                                                |                                                                                              |                                                                                     |
|                                                           |                                                                                                                                                                                |                                                                                              |                                                                                     |
| <b>Time frame: past 36 months</b>                         |                                                                                                                                                                                |                                                                                              |                                                                                     |
| 2                                                         | Grants or contracts from any entity (if not indicated in item #1 above).                                                                                                       | None                                                                                         |                                                                                     |
|                                                           |                                                                                                                                                                                |                                                                                              |                                                                                     |
| 3                                                         | Royalties or licenses                                                                                                                                                          | None                                                                                         |                                                                                     |
|                                                           |                                                                                                                                                                                |                                                                                              |                                                                                     |
| 4                                                         | Consulting fees                                                                                                                                                                | None                                                                                         |                                                                                     |
|                                                           |                                                                                                                                                                                |                                                                                              |                                                                                     |
|                                                           |                                                                                                                                                                                |                                                                                              |                                                                                     |

|    |                                                                                                              |          |  |
|----|--------------------------------------------------------------------------------------------------------------|----------|--|
| 5  | Payment or honoraria for lectures, presentations, speakers bureaus, manuscript writing or educational events | ___ None |  |
|    |                                                                                                              |          |  |
|    |                                                                                                              |          |  |
| 6  | Payment for expert testimony                                                                                 | ___ None |  |
|    |                                                                                                              |          |  |
|    |                                                                                                              |          |  |
| 7  | Support for attending meetings and/or travel                                                                 | ___ None |  |
|    |                                                                                                              |          |  |
|    |                                                                                                              |          |  |
| 8  | Patents planned, issued or pending                                                                           | ___ None |  |
|    |                                                                                                              |          |  |
|    |                                                                                                              |          |  |
| 9  | Participation on a Data Safety Monitoring Board or Advisory Board                                            | ___ None |  |
|    |                                                                                                              |          |  |
|    |                                                                                                              |          |  |
| 10 | Leadership or fiduciary role in other board, society, committee or advocacy group, paid or unpaid            | ___ None |  |
|    |                                                                                                              |          |  |
|    |                                                                                                              |          |  |
| 11 | Stock or stock options                                                                                       | ___ None |  |
|    |                                                                                                              |          |  |
|    |                                                                                                              |          |  |
| 12 | Receipt of equipment, materials, drugs, medical writing, gifts or other services                             | ___ None |  |
|    |                                                                                                              |          |  |
|    |                                                                                                              |          |  |
| 13 | Other financial or non-financial interests                                                                   | ___ None |  |
|    |                                                                                                              |          |  |
|    |                                                                                                              |          |  |

**Please summarize the above conflict of interest in the following box:**

There is no conflict of interest to declare.

**Please place an "X" next to the following statement to indicate your agreement:**

**X   I certify that I have answered every question and have not altered the wording of any of the questions on this form.**

## ICMJE DISCLOSURE FORM

Date: 13/12/2023

Your Name: Alicia May Lim

Manuscript Title: A two-phased study on the use of remote photoplethysmography (rPPG) in paediatric care

Manuscript number (if known): ATM-23-1896

In the interest of transparency, we ask you to disclose all relationships/activities/interests listed below that are related to the content of your manuscript. "Related" means any relation with for-profit or not-for-profit third parties whose interests may be affected by the content of the manuscript. Disclosure represents a commitment to transparency and does not necessarily indicate a bias. If you are in doubt about whether to list a relationship/activity/interest, it is preferable that you do so.

The following questions apply to the author's relationships/activities/interests as they relate to the current manuscript only.

The author's relationships/activities/interests should be defined broadly. For example, if your manuscript pertains to the epidemiology of hypertension, you should declare all relationships with manufacturers of antihypertensive medication, even if that medication is not mentioned in the manuscript.

In item #1 below, report all support for the work reported in this manuscript without time limit. For all other items, the time frame for disclosure is the past 36 months.

|                                                           |                                                                                                                                                                                | Name all entities with whom you have this relationship or indicate none (add rows as needed) | Specifications/Comments (e.g., if payments were made to you or to your institution) |
|-----------------------------------------------------------|--------------------------------------------------------------------------------------------------------------------------------------------------------------------------------|----------------------------------------------------------------------------------------------|-------------------------------------------------------------------------------------|
| <b>Time frame: Since the initial planning of the work</b> |                                                                                                                                                                                |                                                                                              |                                                                                     |
| 1                                                         | All support for the present manuscript (e.g., funding, provision of study materials, medical writing, article processing charges, etc.)<br><b>No time limit for this item.</b> | None                                                                                         |                                                                                     |
|                                                           |                                                                                                                                                                                |                                                                                              |                                                                                     |
|                                                           |                                                                                                                                                                                |                                                                                              |                                                                                     |
|                                                           |                                                                                                                                                                                |                                                                                              |                                                                                     |
|                                                           |                                                                                                                                                                                |                                                                                              |                                                                                     |
|                                                           |                                                                                                                                                                                |                                                                                              |                                                                                     |
| <b>Time frame: past 36 months</b>                         |                                                                                                                                                                                |                                                                                              |                                                                                     |
| 2                                                         | Grants or contracts from any entity (if not indicated in item #1 above).                                                                                                       | None                                                                                         |                                                                                     |
|                                                           |                                                                                                                                                                                |                                                                                              |                                                                                     |
| 3                                                         | Royalties or licenses                                                                                                                                                          | None                                                                                         |                                                                                     |
|                                                           |                                                                                                                                                                                |                                                                                              |                                                                                     |
| 4                                                         | Consulting fees                                                                                                                                                                | None                                                                                         |                                                                                     |
|                                                           |                                                                                                                                                                                |                                                                                              |                                                                                     |
|                                                           |                                                                                                                                                                                |                                                                                              |                                                                                     |

|    |                                                                                                              |          |  |
|----|--------------------------------------------------------------------------------------------------------------|----------|--|
| 5  | Payment or honoraria for lectures, presentations, speakers bureaus, manuscript writing or educational events | ___ None |  |
|    |                                                                                                              |          |  |
|    |                                                                                                              |          |  |
| 6  | Payment for expert testimony                                                                                 | ___ None |  |
|    |                                                                                                              |          |  |
|    |                                                                                                              |          |  |
| 7  | Support for attending meetings and/or travel                                                                 | ___ None |  |
|    |                                                                                                              |          |  |
|    |                                                                                                              |          |  |
| 8  | Patents planned, issued or pending                                                                           | ___ None |  |
|    |                                                                                                              |          |  |
|    |                                                                                                              |          |  |
| 9  | Participation on a Data Safety Monitoring Board or Advisory Board                                            | ___ None |  |
|    |                                                                                                              |          |  |
|    |                                                                                                              |          |  |
| 10 | Leadership or fiduciary role in other board, society, committee or advocacy group, paid or unpaid            | ___ None |  |
|    |                                                                                                              |          |  |
|    |                                                                                                              |          |  |
| 11 | Stock or stock options                                                                                       | ___ None |  |
|    |                                                                                                              |          |  |
|    |                                                                                                              |          |  |
| 12 | Receipt of equipment, materials, drugs, medical writing, gifts or other services                             | ___ None |  |
|    |                                                                                                              |          |  |
|    |                                                                                                              |          |  |
| 13 | Other financial or non-financial interests                                                                   | ___ None |  |
|    |                                                                                                              |          |  |
|    |                                                                                                              |          |  |

**Please summarize the above conflict of interest in the following box:**

There is no conflict of interest to declare.

**Please place an "X" next to the following statement to indicate your agreement:**

**X   I certify that I have answered every question and have not altered the wording of any of the questions on this form.**

## ICMJE DISCLOSURE FORM

Date: 13/12/2023

Your Name: Bin Huey Quek

Manuscript Title: A two-phased study on the use of remote photoplethysmography (rPPG) in paediatric care

Manuscript number (if known): ATM-23-1896

In the interest of transparency, we ask you to disclose all relationships/activities/interests listed below that are related to the content of your manuscript. "Related" means any relation with for-profit or not-for-profit third parties whose interests may be affected by the content of the manuscript. Disclosure represents a commitment to transparency and does not necessarily indicate a bias. If you are in doubt about whether to list a relationship/activity/interest, it is preferable that you do so.

The following questions apply to the author's relationships/activities/interests as they relate to the current manuscript only.

The author's relationships/activities/interests should be defined broadly. For example, if your manuscript pertains to the epidemiology of hypertension, you should declare all relationships with manufacturers of antihypertensive medication, even if that medication is not mentioned in the manuscript.

In item #1 below, report all support for the work reported in this manuscript without time limit. For all other items, the time frame for disclosure is the past 36 months.

|                                                           |                                                                                                                                                                                | Name all entities with whom you have this relationship or indicate none (add rows as needed) | Specifications/Comments (e.g., if payments were made to you or to your institution) |
|-----------------------------------------------------------|--------------------------------------------------------------------------------------------------------------------------------------------------------------------------------|----------------------------------------------------------------------------------------------|-------------------------------------------------------------------------------------|
| <b>Time frame: Since the initial planning of the work</b> |                                                                                                                                                                                |                                                                                              |                                                                                     |
| 1                                                         | All support for the present manuscript (e.g., funding, provision of study materials, medical writing, article processing charges, etc.)<br><b>No time limit for this item.</b> | ___ None                                                                                     |                                                                                     |
|                                                           |                                                                                                                                                                                |                                                                                              |                                                                                     |
|                                                           |                                                                                                                                                                                |                                                                                              |                                                                                     |
|                                                           |                                                                                                                                                                                |                                                                                              |                                                                                     |
|                                                           |                                                                                                                                                                                |                                                                                              |                                                                                     |
|                                                           |                                                                                                                                                                                |                                                                                              |                                                                                     |
| <b>Time frame: past 36 months</b>                         |                                                                                                                                                                                |                                                                                              |                                                                                     |
| 2                                                         | Grants or contracts from any entity (if not indicated in item #1 above).                                                                                                       | ___ None                                                                                     |                                                                                     |
|                                                           |                                                                                                                                                                                |                                                                                              |                                                                                     |
| 3                                                         | Royalties or licenses                                                                                                                                                          | ___ None                                                                                     |                                                                                     |
|                                                           |                                                                                                                                                                                |                                                                                              |                                                                                     |
| 4                                                         | Consulting fees                                                                                                                                                                | ___ None                                                                                     |                                                                                     |
|                                                           |                                                                                                                                                                                |                                                                                              |                                                                                     |
|                                                           |                                                                                                                                                                                |                                                                                              |                                                                                     |

|    |                                                                                                              |          |  |
|----|--------------------------------------------------------------------------------------------------------------|----------|--|
| 5  | Payment or honoraria for lectures, presentations, speakers bureaus, manuscript writing or educational events | ___ None |  |
|    |                                                                                                              |          |  |
|    |                                                                                                              |          |  |
| 6  | Payment for expert testimony                                                                                 | ___ None |  |
|    |                                                                                                              |          |  |
|    |                                                                                                              |          |  |
| 7  | Support for attending meetings and/or travel                                                                 | ___ None |  |
|    |                                                                                                              |          |  |
|    |                                                                                                              |          |  |
| 8  | Patents planned, issued or pending                                                                           | ___ None |  |
|    |                                                                                                              |          |  |
|    |                                                                                                              |          |  |
| 9  | Participation on a Data Safety Monitoring Board or Advisory Board                                            | ___ None |  |
|    |                                                                                                              |          |  |
|    |                                                                                                              |          |  |
| 10 | Leadership or fiduciary role in other board, society, committee or advocacy group, paid or unpaid            | ___ None |  |
|    |                                                                                                              |          |  |
|    |                                                                                                              |          |  |
| 11 | Stock or stock options                                                                                       | ___ None |  |
|    |                                                                                                              |          |  |
|    |                                                                                                              |          |  |
| 12 | Receipt of equipment, materials, drugs, medical writing, gifts or other services                             | ___ None |  |
|    |                                                                                                              |          |  |
|    |                                                                                                              |          |  |
| 13 | Other financial or non-financial interests                                                                   | ___ None |  |
|    |                                                                                                              |          |  |
|    |                                                                                                              |          |  |

**Please summarize the above conflict of interest in the following box:**

There is no conflict of interest to declare.

**Please place an "X" next to the following statement to indicate your agreement:**

**X   I certify that I have answered every question and have not altered the wording of any of the questions on this form.**



## ICMJE DISCLOSURE FORM

Date: 13/12/2023

Your Name: Mee See How

Manuscript Title: A two-phased study on the use of remote photoplethysmography (rPPG) in paediatric care

Manuscript number (if known): ATM-23-1896

In the interest of transparency, we ask you to disclose all relationships/activities/interests listed below that are related to the content of your manuscript. "Related" means any relation with for-profit or not-for-profit third parties whose interests may be affected by the content of the manuscript. Disclosure represents a commitment to transparency and does not necessarily indicate a bias. If you are in doubt about whether to list a relationship/activity/interest, it is preferable that you do so.

The following questions apply to the author's relationships/activities/interests as they relate to the current manuscript only.

The author's relationships/activities/interests should be defined broadly. For example, if your manuscript pertains to the epidemiology of hypertension, you should declare all relationships with manufacturers of antihypertensive medication, even if that medication is not mentioned in the manuscript.

In item #1 below, report all support for the work reported in this manuscript without time limit. For all other items, the time frame for disclosure is the past 36 months.

|                                                           |                                                                                                                                                                                | Name all entities with whom you have this relationship or indicate none (add rows as needed) | Specifications/Comments (e.g., if payments were made to you or to your institution) |
|-----------------------------------------------------------|--------------------------------------------------------------------------------------------------------------------------------------------------------------------------------|----------------------------------------------------------------------------------------------|-------------------------------------------------------------------------------------|
| <b>Time frame: Since the initial planning of the work</b> |                                                                                                                                                                                |                                                                                              |                                                                                     |
| 1                                                         | All support for the present manuscript (e.g., funding, provision of study materials, medical writing, article processing charges, etc.)<br><b>No time limit for this item.</b> | ___ None                                                                                     |                                                                                     |
|                                                           |                                                                                                                                                                                |                                                                                              |                                                                                     |
|                                                           |                                                                                                                                                                                |                                                                                              |                                                                                     |
|                                                           |                                                                                                                                                                                |                                                                                              |                                                                                     |
|                                                           |                                                                                                                                                                                |                                                                                              |                                                                                     |
|                                                           |                                                                                                                                                                                |                                                                                              |                                                                                     |
| <b>Time frame: past 36 months</b>                         |                                                                                                                                                                                |                                                                                              |                                                                                     |
| 2                                                         | Grants or contracts from any entity (if not indicated in item #1 above).                                                                                                       | ___ None                                                                                     |                                                                                     |
|                                                           |                                                                                                                                                                                |                                                                                              |                                                                                     |
| 3                                                         | Royalties or licenses                                                                                                                                                          | ___ None                                                                                     |                                                                                     |
|                                                           |                                                                                                                                                                                |                                                                                              |                                                                                     |
| 4                                                         | Consulting fees                                                                                                                                                                | ___ None                                                                                     |                                                                                     |
|                                                           |                                                                                                                                                                                |                                                                                              |                                                                                     |
|                                                           |                                                                                                                                                                                |                                                                                              |                                                                                     |

|    |                                                                                                              |          |  |
|----|--------------------------------------------------------------------------------------------------------------|----------|--|
| 5  | Payment or honoraria for lectures, presentations, speakers bureaus, manuscript writing or educational events | ___ None |  |
|    |                                                                                                              |          |  |
|    |                                                                                                              |          |  |
| 6  | Payment for expert testimony                                                                                 | ___ None |  |
|    |                                                                                                              |          |  |
|    |                                                                                                              |          |  |
| 7  | Support for attending meetings and/or travel                                                                 | ___ None |  |
|    |                                                                                                              |          |  |
|    |                                                                                                              |          |  |
| 8  | Patents planned, issued or pending                                                                           | ___ None |  |
|    |                                                                                                              |          |  |
|    |                                                                                                              |          |  |
| 9  | Participation on a Data Safety Monitoring Board or Advisory Board                                            | ___ None |  |
|    |                                                                                                              |          |  |
|    |                                                                                                              |          |  |
| 10 | Leadership or fiduciary role in other board, society, committee or advocacy group, paid or unpaid            | ___ None |  |
|    |                                                                                                              |          |  |
|    |                                                                                                              |          |  |
| 11 | Stock or stock options                                                                                       | ___ None |  |
|    |                                                                                                              |          |  |
|    |                                                                                                              |          |  |
| 12 | Receipt of equipment, materials, drugs, medical writing, gifts or other services                             | ___ None |  |
|    |                                                                                                              |          |  |
|    |                                                                                                              |          |  |
| 13 | Other financial or non-financial interests                                                                   | ___ None |  |
|    |                                                                                                              |          |  |
|    |                                                                                                              |          |  |

**Please summarize the above conflict of interest in the following box:**

There is no conflict of interest to declare.

**Please place an "X" next to the following statement to indicate your agreement:**

  X   I certify that I have answered every question and have not altered the wording of any of the questions on this form.

## ICMJE DISCLOSURE FORM

Date: 13/12/2023

Your Name: Joel Meng Fai Chan

Manuscript Title: A two-phased study on the use of remote photoplethysmography (rPPG) in paediatric care

Manuscript number (if known): ATM-23-1896

In the interest of transparency, we ask you to disclose all relationships/activities/interests listed below that are related to the content of your manuscript. "Related" means any relation with for-profit or not-for-profit third parties whose interests may be affected by the content of the manuscript. Disclosure represents a commitment to transparency and does not necessarily indicate a bias. If you are in doubt about whether to list a relationship/activity/interest, it is preferable that you do so.

The following questions apply to the author's relationships/activities/interests as they relate to the current manuscript only.

The author's relationships/activities/interests should be defined broadly. For example, if your manuscript pertains to the epidemiology of hypertension, you should declare all relationships with manufacturers of antihypertensive medication, even if that medication is not mentioned in the manuscript.

In item #1 below, report all support for the work reported in this manuscript without time limit. For all other items, the time frame for disclosure is the past 36 months.

|                                                           |                                                                                                                                                                                | Name all entities with whom you have this relationship or indicate none (add rows as needed) | Specifications/Comments (e.g., if payments were made to you or to your institution) |
|-----------------------------------------------------------|--------------------------------------------------------------------------------------------------------------------------------------------------------------------------------|----------------------------------------------------------------------------------------------|-------------------------------------------------------------------------------------|
| <b>Time frame: Since the initial planning of the work</b> |                                                                                                                                                                                |                                                                                              |                                                                                     |
| 1                                                         | All support for the present manuscript (e.g., funding, provision of study materials, medical writing, article processing charges, etc.)<br><b>No time limit for this item.</b> | ___ None                                                                                     |                                                                                     |
|                                                           |                                                                                                                                                                                |                                                                                              |                                                                                     |
|                                                           |                                                                                                                                                                                |                                                                                              |                                                                                     |
|                                                           |                                                                                                                                                                                |                                                                                              |                                                                                     |
|                                                           |                                                                                                                                                                                |                                                                                              |                                                                                     |
|                                                           |                                                                                                                                                                                |                                                                                              |                                                                                     |
| <b>Time frame: past 36 months</b>                         |                                                                                                                                                                                |                                                                                              |                                                                                     |
| 2                                                         | Grants or contracts from any entity (if not indicated in item #1 above).                                                                                                       | ___ None                                                                                     |                                                                                     |
|                                                           |                                                                                                                                                                                |                                                                                              |                                                                                     |
| 3                                                         | Royalties or licenses                                                                                                                                                          | ___ None                                                                                     |                                                                                     |
|                                                           |                                                                                                                                                                                |                                                                                              |                                                                                     |
| 4                                                         | Consulting fees                                                                                                                                                                | ___ None                                                                                     |                                                                                     |
|                                                           |                                                                                                                                                                                |                                                                                              |                                                                                     |
|                                                           |                                                                                                                                                                                |                                                                                              |                                                                                     |

|    |                                                                                                              |          |  |
|----|--------------------------------------------------------------------------------------------------------------|----------|--|
| 5  | Payment or honoraria for lectures, presentations, speakers bureaus, manuscript writing or educational events | ___ None |  |
|    |                                                                                                              |          |  |
|    |                                                                                                              |          |  |
| 6  | Payment for expert testimony                                                                                 | ___ None |  |
|    |                                                                                                              |          |  |
|    |                                                                                                              |          |  |
| 7  | Support for attending meetings and/or travel                                                                 | ___ None |  |
|    |                                                                                                              |          |  |
|    |                                                                                                              |          |  |
| 8  | Patents planned, issued or pending                                                                           | ___ None |  |
|    |                                                                                                              |          |  |
|    |                                                                                                              |          |  |
| 9  | Participation on a Data Safety Monitoring Board or Advisory Board                                            | ___ None |  |
|    |                                                                                                              |          |  |
|    |                                                                                                              |          |  |
| 10 | Leadership or fiduciary role in other board, society, committee or advocacy group, paid or unpaid            | ___ None |  |
|    |                                                                                                              |          |  |
|    |                                                                                                              |          |  |
| 11 | Stock or stock options                                                                                       | ___ None |  |
|    |                                                                                                              |          |  |
|    |                                                                                                              |          |  |
| 12 | Receipt of equipment, materials, drugs, medical writing, gifts or other services                             | ___ None |  |
|    |                                                                                                              |          |  |
|    |                                                                                                              |          |  |
| 13 | Other financial or non-financial interests                                                                   | ___ None |  |
|    |                                                                                                              |          |  |
|    |                                                                                                              |          |  |

**Please summarize the above conflict of interest in the following box:**

There is no conflict of interest to declare.

**Please place an "X" next to the following statement to indicate your agreement:**

**X   I certify that I have answered every question and have not altered the wording of any of the questions on this form.**

## ICMJE DISCLOSURE FORM

Date: 13/12/2023

Your Name: Seved Ehsan Saffari

Manuscript Title: A two-phased study on the use of remote photoplethysmography (rPPG) in paediatric care

Manuscript number (if known): ATM-23-1896

In the interest of transparency, we ask you to disclose all relationships/activities/interests listed below that are related to the content of your manuscript. "Related" means any relation with for-profit or not-for-profit third parties whose interests may be affected by the content of the manuscript. Disclosure represents a commitment to transparency and does not necessarily indicate a bias. If you are in doubt about whether to list a relationship/activity/interest, it is preferable that you do so.

The following questions apply to the author's relationships/activities/interests as they relate to the current manuscript only.

The author's relationships/activities/interests should be defined broadly. For example, if your manuscript pertains to the epidemiology of hypertension, you should declare all relationships with manufacturers of antihypertensive medication, even if that medication is not mentioned in the manuscript.

In item #1 below, report all support for the work reported in this manuscript without time limit. For all other items, the time frame for disclosure is the past 36 months.

|                                                           |                                                                                                                                                                                | Name all entities with whom you have this relationship or indicate none (add rows as needed) | Specifications/Comments (e.g., if payments were made to you or to your institution) |
|-----------------------------------------------------------|--------------------------------------------------------------------------------------------------------------------------------------------------------------------------------|----------------------------------------------------------------------------------------------|-------------------------------------------------------------------------------------|
| <b>Time frame: Since the initial planning of the work</b> |                                                                                                                                                                                |                                                                                              |                                                                                     |
| 1                                                         | All support for the present manuscript (e.g., funding, provision of study materials, medical writing, article processing charges, etc.)<br><b>No time limit for this item.</b> | ___ None                                                                                     |                                                                                     |
|                                                           |                                                                                                                                                                                |                                                                                              |                                                                                     |
|                                                           |                                                                                                                                                                                |                                                                                              |                                                                                     |
|                                                           |                                                                                                                                                                                |                                                                                              |                                                                                     |
|                                                           |                                                                                                                                                                                |                                                                                              |                                                                                     |
|                                                           |                                                                                                                                                                                |                                                                                              |                                                                                     |
| <b>Time frame: past 36 months</b>                         |                                                                                                                                                                                |                                                                                              |                                                                                     |
| 2                                                         | Grants or contracts from any entity (if not indicated in item #1 above).                                                                                                       | ___ None                                                                                     |                                                                                     |
|                                                           |                                                                                                                                                                                |                                                                                              |                                                                                     |
| 3                                                         | Royalties or licenses                                                                                                                                                          | ___ None                                                                                     |                                                                                     |
|                                                           |                                                                                                                                                                                |                                                                                              |                                                                                     |
| 4                                                         | Consulting fees                                                                                                                                                                | ___ None                                                                                     |                                                                                     |
|                                                           |                                                                                                                                                                                |                                                                                              |                                                                                     |
|                                                           |                                                                                                                                                                                |                                                                                              |                                                                                     |

|    |                                                                                                              |          |  |
|----|--------------------------------------------------------------------------------------------------------------|----------|--|
| 5  | Payment or honoraria for lectures, presentations, speakers bureaus, manuscript writing or educational events | ___ None |  |
|    |                                                                                                              |          |  |
|    |                                                                                                              |          |  |
| 6  | Payment for expert testimony                                                                                 | ___ None |  |
|    |                                                                                                              |          |  |
|    |                                                                                                              |          |  |
| 7  | Support for attending meetings and/or travel                                                                 | ___ None |  |
|    |                                                                                                              |          |  |
|    |                                                                                                              |          |  |
| 8  | Patents planned, issued or pending                                                                           | ___ None |  |
|    |                                                                                                              |          |  |
|    |                                                                                                              |          |  |
| 9  | Participation on a Data Safety Monitoring Board or Advisory Board                                            | ___ None |  |
|    |                                                                                                              |          |  |
|    |                                                                                                              |          |  |
| 10 | Leadership or fiduciary role in other board, society, committee or advocacy group, paid or unpaid            | ___ None |  |
|    |                                                                                                              |          |  |
|    |                                                                                                              |          |  |
| 11 | Stock or stock options                                                                                       | ___ None |  |
|    |                                                                                                              |          |  |
|    |                                                                                                              |          |  |
| 12 | Receipt of equipment, materials, drugs, medical writing, gifts or other services                             | ___ None |  |
|    |                                                                                                              |          |  |
|    |                                                                                                              |          |  |
| 13 | Other financial or non-financial interests                                                                   | ___ None |  |
|    |                                                                                                              |          |  |
|    |                                                                                                              |          |  |

**Please summarize the above conflict of interest in the following box:**

There is no conflict of interest to declare.

**Please place an "X" next to the following statement to indicate your agreement:**

**X   I certify that I have answered every question and have not altered the wording of any of the questions on this form.**

## ICMJE DISCLOSURE FORM

Date: 13/12/2023

Your Name: Kee Chong Ng

Manuscript Title: A two-phased study on the use of remote photoplethysmography (rPPG) in paediatric care

Manuscript number (if known): ATM-23-1896

In the interest of transparency, we ask you to disclose all relationships/activities/interests listed below that are related to the content of your manuscript. "Related" means any relation with for-profit or not-for-profit third parties whose interests may be affected by the content of the manuscript. Disclosure represents a commitment to transparency and does not necessarily indicate a bias. If you are in doubt about whether to list a relationship/activity/interest, it is preferable that you do so.

The following questions apply to the author's relationships/activities/interests as they relate to the current manuscript only.

The author's relationships/activities/interests should be defined broadly. For example, if your manuscript pertains to the epidemiology of hypertension, you should declare all relationships with manufacturers of antihypertensive medication, even if that medication is not mentioned in the manuscript.

In item #1 below, report all support for the work reported in this manuscript without time limit. For all other items, the time frame for disclosure is the past 36 months.

|                                                           |                                                                                                                                                                                | Name all entities with whom you have this relationship or indicate none (add rows as needed) | Specifications/Comments (e.g., if payments were made to you or to your institution) |
|-----------------------------------------------------------|--------------------------------------------------------------------------------------------------------------------------------------------------------------------------------|----------------------------------------------------------------------------------------------|-------------------------------------------------------------------------------------|
| <b>Time frame: Since the initial planning of the work</b> |                                                                                                                                                                                |                                                                                              |                                                                                     |
| 1                                                         | All support for the present manuscript (e.g., funding, provision of study materials, medical writing, article processing charges, etc.)<br><b>No time limit for this item.</b> | ___ None                                                                                     |                                                                                     |
|                                                           |                                                                                                                                                                                |                                                                                              |                                                                                     |
|                                                           |                                                                                                                                                                                |                                                                                              |                                                                                     |
|                                                           |                                                                                                                                                                                |                                                                                              |                                                                                     |
|                                                           |                                                                                                                                                                                |                                                                                              |                                                                                     |
|                                                           |                                                                                                                                                                                |                                                                                              |                                                                                     |
| <b>Time frame: past 36 months</b>                         |                                                                                                                                                                                |                                                                                              |                                                                                     |
| 2                                                         | Grants or contracts from any entity (if not indicated in item #1 above).                                                                                                       | ___ None                                                                                     |                                                                                     |
|                                                           |                                                                                                                                                                                |                                                                                              |                                                                                     |
| 3                                                         | Royalties or licenses                                                                                                                                                          | ___ None                                                                                     |                                                                                     |
|                                                           |                                                                                                                                                                                |                                                                                              |                                                                                     |
| 4                                                         | Consulting fees                                                                                                                                                                | ___ None                                                                                     |                                                                                     |
|                                                           |                                                                                                                                                                                |                                                                                              |                                                                                     |
|                                                           |                                                                                                                                                                                |                                                                                              |                                                                                     |

|    |                                                                                                              |          |  |
|----|--------------------------------------------------------------------------------------------------------------|----------|--|
| 5  | Payment or honoraria for lectures, presentations, speakers bureaus, manuscript writing or educational events | ___ None |  |
|    |                                                                                                              |          |  |
|    |                                                                                                              |          |  |
| 6  | Payment for expert testimony                                                                                 | ___ None |  |
|    |                                                                                                              |          |  |
|    |                                                                                                              |          |  |
| 7  | Support for attending meetings and/or travel                                                                 | ___ None |  |
|    |                                                                                                              |          |  |
|    |                                                                                                              |          |  |
| 8  | Patents planned, issued or pending                                                                           | ___ None |  |
|    |                                                                                                              |          |  |
|    |                                                                                                              |          |  |
| 9  | Participation on a Data Safety Monitoring Board or Advisory Board                                            | ___ None |  |
|    |                                                                                                              |          |  |
|    |                                                                                                              |          |  |
| 10 | Leadership or fiduciary role in other board, society, committee or advocacy group, paid or unpaid            | ___ None |  |
|    |                                                                                                              |          |  |
|    |                                                                                                              |          |  |
| 11 | Stock or stock options                                                                                       | ___ None |  |
|    |                                                                                                              |          |  |
|    |                                                                                                              |          |  |
| 12 | Receipt of equipment, materials, drugs, medical writing, gifts or other services                             | ___ None |  |
|    |                                                                                                              |          |  |
|    |                                                                                                              |          |  |
| 13 | Other financial or non-financial interests                                                                   | ___ None |  |
|    |                                                                                                              |          |  |
|    |                                                                                                              |          |  |

**Please summarize the above conflict of interest in the following box:**

There is no conflict of interest to declare.

**Please place an "X" next to the following statement to indicate your agreement:**

**X   I certify that I have answered every question and have not altered the wording of any of the questions on this form.**
