# Supplementary material for: A two-phased study on the use of remote photoplethysmography (rPPG) in paediatric care
Source: PubMed Central journal article supplement — Ann Transl Med. 2024 May 27;12(3):46. doi: 10.21037/atm-23-1896 (PMC11193567; doi:10.21037/atm-23-1896), 2024-05-27
Supplement: atm-12-03-46-dss.pdf [file atm-12-03-46-dss.pdf]

## Data Sharing Statement

|                     |                                                                                                                                                     |                                                                                                                                                                              |
|---------------------|-----------------------------------------------------------------------------------------------------------------------------------------------------|------------------------------------------------------------------------------------------------------------------------------------------------------------------------------|
| <b>Article Info</b> | https://dx.doi.org/10.21037/atm-23-1896                                                                                                             |                                                                                                                                                                              |
| <b>Item</b>         | <b>Question</b>                                                                                                                                     | <b>Authors' Response<br/>(place "-" if not applicable)</b>                                                                                                                   |
| 1                   | Would you like to share data collected for your study to others?                                                                                    | Yes.                                                                                                                                                                         |
| 2                   | If not, would you like to share the reason for your decision?                                                                                       | -                                                                                                                                                                            |
| 3                   | What data in particular will be shared?                                                                                                             | De-identified data from all patients who consented to be part of this research study.                                                                                        |
| 4                   | Any other documents will be shared? Such as study protocol, statistical analysis plan, informed consent form, clinical study report, analytic code. | Study protocol, statistical analysis plan, informed consent form and clinical study report will also be shared if requested.                                                 |
| 5                   | When will data availability begin?                                                                                                                  | From the publication date.                                                                                                                                                   |
| 6                   | When will data availability end?                                                                                                                    | Two years from the publication date.                                                                                                                                         |
| 7                   | To whom will you share the data?                                                                                                                    | Clinical researchers who are interested in advancing the use of remote photoplethysmography (rPPG) for paediatric patients.                                                  |
| 8                   | For what type of analysis or purpose?                                                                                                               | Validation or further analysis on the use of rPPG in children.                                                                                                               |
| 9                   | How or where can the data/documents be obtained?                                                                                                    | Emails could be sent to the address below to obtain the shared data:<br><a href="mailto:nur.adila.ahmad.hatib@singhealth.com.sg">nur.adila.ahmad.hatib@singhealth.com.sg</a> |
| 10                  | Any other restrictions?                                                                                                                             | We may balance the potential benefits and risks for each request and then provide the data that could be shared.                                                             |
