# Supplementary material for: A two-phased study on the use of remote photoplethysmography (rPPG) in paediatric care
Source: PubMed Central journal article supplement — Ann Transl Med. 2024 May 27;12(3):46. doi: 10.21037/atm-23-1896 (PMC11193567; doi:10.21037/atm-23-1896), 2024-05-27
Supplement: atm-12-03-46-supplementary.pdf [file atm-12-03-46-supplementary.pdf]

**Table S1** Number of recordings by age group (Phase 1)

| Age group        | Number of patients | Number of recordings |
|------------------|--------------------|----------------------|
| ≤28 days old     | 10                 | 172                  |
| 29 to <5 years   | 2                  | 2                    |
| ≥ 5 to <12 years | 11                 | 248                  |
| ≥12 to 16 years  | 17                 | 345                  |
